# Supplementary material for: ZT Optimization: An Application Focus
Source: MDPI journal article supplement (doi:10.3390/ma10030309), 2017-03-17
Supplement: s1 [file s1]

# Supplementary Materials: ZT Optimization: An Application Focus

Richard Tuley, Kevin Simpson

## 1. Introduction

The modelling approach was based on the theory found in References [1] and [2]. The equations used are explicitly stated here for completeness.

## 2. Fermi-Dirac Integrals

The Fermi Dirac integrals used in this supplementary information are defined as:

$$F_j(\epsilon) = \int_0^\infty \frac{E^j}{1 + e^{E-\epsilon}} dE. \quad (1)$$

They were numerically solved in Matlab using the script in reference [3] using the numerical approximations referenced within, modified to remove the gamma function.

## 3. Fermi level

The approach taken was to fix the doping level,  $N_d$ , and the material parameters, which can then be used to determine the Fermi level position. Charge neutrality gives the conduction band electron concentration,  $n$  and the valence band hole concentration,  $p$ , as

$$n = N_d + p \quad (2)$$

as any additional carriers must have been excited across the band gap. From standard band theory

$$n = 4\pi \left( \frac{2m_n^* kT}{h^2} \right)^{\frac{3}{2}} F_{\frac{1}{2}} \left( \frac{E_f}{kT} \right) \quad (3)$$

$$p = 4\pi \left( \frac{2m_p^* kT}{h^2} \right)^{\frac{3}{2}} F_{\frac{1}{2}} \left( \frac{E_g - E_f}{kT} \right) \quad (4)$$

where  $m_n^*$  and  $m_p^*$  is the density of states effective mass of the conduction band and valence band respectively.  $E_g$  is the band gap and  $E_f$  is the Fermi level, with the energy scale zeroed at the bottom of the conduction band. By combining Equations (2)–(4), these were numerically solved (using the Matlab function fzero) to find  $E_f$ .

The Fermi level can be redefined as the reduced Fermi energy for the conduction band,  $\epsilon_n$ , and valence band,  $\epsilon_p$  respectively:

$$\epsilon_n = \frac{E_f}{kT} \quad (5)$$

$$\epsilon_p = \frac{E_f - E_g}{kT} \quad (6)$$

## 4. Conductivity

The conductivity can be separately calculated for each band as  $\sigma_v$ , where  $v = n$  or  $p$  respectively for the conduction and valence band:

$$\sigma_v = 2 \left( \frac{2\pi m_v^* kT}{h^2} \right)^{\frac{3}{2}} q \mu_{vc} \frac{F_{s+\frac{1}{2}}(\epsilon_v)}{\Gamma(s + \frac{1}{2})} \quad (7)$$

where  $\mu_{vc}$  is the temperature dependent mobility in the limit of low carrier concentration (i.e. the conductivity formula has already taken into account the mobility's dependence on doping as  $F_0(\epsilon_v)/F_{\frac{1}{2}}(\epsilon_v)$ ). The scattering factor is taken as  $s = -\frac{1}{2}$  in this work, corresponding to acoustic phonon scattering. For acoustic phonon scattering only (used for the bismuth telluride data):

$$\mu_{vc} = \mu_{v0 \text{ acoustic}} \left( \frac{T_0}{T} \right)^{\frac{3}{2}} \quad (8)$$

where  $\mu_{v0 \text{ acoustic}}$  is the known input value of the acoustic phonon scattering limited mobility in the limit of low carrier concentration at a temperature  $T_0$ . For the combination of acoustic and alloy scattering used for the silicide material:

$$\frac{1}{\mu_{vc}} = \frac{1}{\mu_{v0 \text{ acoustic}} \left( \frac{T_0}{T} \right)^{\frac{3}{2}}} + \frac{1}{\mu_{v0 \text{ alloy}} \left( \frac{T_0}{T} \right)^{\frac{1}{2}}} \quad (9)$$

where  $\mu_{v0 \text{ alloy}}$  is the known input value of the alloy scattering limited mobility in the limit of low carrier concentration at a temperature  $T_0$ .

The total conductivity is then simply given by:

$$\sigma = \sigma_n + \sigma_p. \quad (10)$$

## 5. Seebeck coefficient

The Seebeck contribution for each band ( $v = n$  or  $p$ ) is given by:

$$\alpha_v = \mp \frac{k}{e} (\delta_v - \epsilon_v) \quad (11)$$

$$\delta_v = \frac{(s + \frac{5}{2}) F_{s+\frac{3}{2}}(\epsilon_v)}{(s + \frac{3}{2}) F_{s+\frac{1}{2}}(\epsilon_v)} \quad (12)$$

where for the conduction band  $-$  is used, and  $+$  for the valence band. The total Seebeck coefficient,  $\alpha$ , is then given by:

$$\alpha = \frac{\alpha_n \sigma_n + \alpha_p \sigma_p}{\sigma_n + \sigma_p}. \quad (13)$$

## 6. Thermal conductivity

The Lorentz number,  $L_v$ , is given by:

$$L_v = \left( \frac{k}{e} \right)^2 \left( \frac{s + \frac{7}{2} F_{s+\frac{5}{2}}(\epsilon_v)}{s + \frac{3}{2} F_{s+\frac{1}{2}}(\epsilon_v)} - \delta_v^2 \right). \quad (14)$$

The total electron and hole contribution to the thermal conductivity is then given by

$$\kappa_{el} = \sigma_n L_v T + \sigma_p L_p T + \frac{\sigma_p \sigma_n}{\sigma_p + \sigma_n} (\alpha_p - \alpha_n)^2 T. \quad (15)$$

The lattice thermal conductivity for bismuth telluride is given by:

$$\kappa_{lat} = \kappa_0 \frac{T_0}{T} \quad (16)$$

where  $\kappa_0$  is the known value of the lattice thermal conductivity at temperature  $T_0$ . The lattice thermal conductivity for the silicide is given by:

$$\kappa_{lat} = \kappa_1 + \kappa_2(T - T_0) \quad (17)$$

where  $\kappa_1$  is the lattice thermal conductivity at temperature  $T_0$  and  $\kappa_2$  is the lattice thermal conductivity gradient (a negative value). The total thermal conductivity is then given by

$$\kappa = \kappa_{el} + \kappa_{lat} \quad (18)$$

## 7. Figure of Merit

The figure of merit is then given by:

$$ZT = \frac{\alpha^2 \sigma T}{\kappa} \quad (19)$$

## References

1. Rowe, D.M.; *CRC Handbook of Thermoelectrics*, 1st ed.; CRC press: Boca Raton, FL, USA, 1995; pp. 43-54.
2. Zhang, L.; Xiao, P.; Shi, L.; Henkelman, G.; Goodenough, J.B.; Zhou, J.; Suppressing the bipolar contribution to the thermoelectric properties of Mg<sub>2</sub>Si<sub>0.4</sub>Sn<sub>0.6</sub> by Ge substitution, *J. Appl. Phys.*, **2015**, *117*, 155103
3. Kim, R.; Lundstrom, M. *Notes on Fermi-Dirac Integrals*, 3rd ed.; Available online: <http://nanohub.org/resources/5475> (accessed on 30 January 2017)
